# Supplementary material for: Eosinophils and drugs for eosinophilia are associated with the risk of colorectal cancer: a Mendelian randomization study
Source: Aging (Albany NY). 2024 Aug 23;16(16):12050–62. doi: 10.18632/aging.206081 (PMC11386931; doi:10.18632/aging.206081)
Supplement: Supplementary Table 1 [file aging-16-206081-s001.xlsx]

## Sheet: heterogeneity
Supplementary Table 1. The pleiotropy and heterogeneity results of eosinophil percentage and eosinophil count with risk of colorectal cancer and skin malignancies.
id.exposure	id.outcome	outcome	exposure	method	Q	Q_df	Q_pval
ieu-b-33	finn-b-C3_COLORECTAL	Colorectal cancer || id:finn-b-C3_COLORECTAL	|| id:ieu-b-33	MR Egger	217.631	203	0.228955
ieu-b-33	finn-b-C3_COLORECTAL	Colorectal cancer || id:finn-b-C3_COLORECTAL	|| id:ieu-b-33	Inverse variance weighted	217.634	204	0.244045
ieu-b-33	finn-b-C3_SKIN	Malignant neoplasm of skin || id:finn-b-C3_SKIN	|| id:ieu-b-33	MR Egger	270.242	202	0.000946969
ieu-b-33	finn-b-C3_SKIN	Malignant neoplasm of skin || id:finn-b-C3_SKIN	|| id:ieu-b-33	Inverse variance weighted	273.594	203	0.00069622
ieu-b-33	finn-b-C3_OTHER_SKIN	Other malignant neoplasms of skin (=non-melanoma skin cancer) || id:finn-b-C3_OTHER_SKIN	|| id:ieu-b-33	MR Egger	269.173	202	0.0010977
ieu-b-33	finn-b-C3_OTHER_SKIN	Other malignant neoplasms of skin (=non-melanoma skin cancer) || id:finn-b-C3_OTHER_SKIN	|| id:ieu-b-33	Inverse variance weighted	272.592	203	0.00080166
ieu-b-33	ieu-b-4965	Colorectal cancer || id:ieu-b-4965	|| id:ieu-b-33	MR Egger	219.81	210	0.307195
ieu-b-33	ieu-b-4965	Colorectal cancer || id:ieu-b-4965	|| id:ieu-b-33	Inverse variance weighted	219.819	211	0.324267
ieu-b-33	ieu-b-4969	Melanoma skin cancer || id:ieu-b-4969	|| id:ieu-b-33	MR Egger	220.364	209	0.281448
ieu-b-33	ieu-b-4969	Melanoma skin cancer || id:ieu-b-4969	|| id:ieu-b-33	Inverse variance weighted	221.499	210	0.279752
ieu-b-33	ieu-b-4959	Malignant non-melanoma skin cancer || id:ieu-b-4959	|| id:ieu-b-33	MR Egger	381.836	201	2.37172e-13
ieu-b-33	ieu-b-4959	Malignant non-melanoma skin cancer || id:ieu-b-4959	|| id:ieu-b-33	Inverse variance weighted	383.049	202	2.45576e-13
ukb-d-30210_irnt	finn-b-C3_COLORECTAL	Colorectal cancer || id:finn-b-C3_COLORECTAL	|| id:ukb-d-30210_irnt	MR Egger	155.408	146	0.281633
ukb-d-30210_irnt	finn-b-C3_COLORECTAL	Colorectal cancer || id:finn-b-C3_COLORECTAL	|| id:ukb-d-30210_irnt	Inverse variance weighted	155.512	147	0.299487
ukb-d-30210_irnt	finn-b-C3_SKIN	Malignant neoplasm of skin || id:finn-b-C3_SKIN	|| id:ukb-d-30210_irnt	MR Egger	175.631	146	0.0477244
ukb-d-30210_irnt	finn-b-C3_SKIN	Malignant neoplasm of skin || id:finn-b-C3_SKIN	|| id:ukb-d-30210_irnt	Inverse variance weighted	179.698	147	0.034402
ukb-d-30210_irnt	finn-b-C3_OTHER_SKIN	Other malignant neoplasms of skin (=non-melanoma skin cancer) || id:finn-b-C3_OTHER_SKIN	|| id:ukb-d-30210_irnt	MR Egger	162.567	145	0.151177
ukb-d-30210_irnt	finn-b-C3_OTHER_SKIN	Other malignant neoplasms of skin (=non-melanoma skin cancer) || id:finn-b-C3_OTHER_SKIN	|| id:ukb-d-30210_irnt	Inverse variance weighted	165.235	146	0.131718
ukb-d-30210_irnt	ieu-b-4965	Colorectal cancer || id:ieu-b-4965	|| id:ukb-d-30210_irnt	MR Egger	150.242	145	0.365711
ukb-d-30210_irnt	ieu-b-4965	Colorectal cancer || id:ieu-b-4965	|| id:ukb-d-30210_irnt	Inverse variance weighted	152.656	146	0.336283
ukb-d-30210_irnt	ieu-b-4969	Melanoma skin cancer || id:ieu-b-4969	|| id:ukb-d-30210_irnt	MR Egger	154.342	145	0.282251
ukb-d-30210_irnt	ieu-b-4969	Melanoma skin cancer || id:ieu-b-4969	|| id:ukb-d-30210_irnt	Inverse variance weighted	156.72	146	0.257393
ukb-d-30210_irnt	ieu-b-4959	Malignant non-melanoma skin cancer || id:ieu-b-4959	|| id:ukb-d-30210_irnt	MR Egger	229.29	141	3.73201e-06
ukb-d-30210_irnt	ieu-b-4959	Malignant non-melanoma skin cancer || id:ieu-b-4959	|| id:ukb-d-30210_irnt	Inverse variance weighted	229.362	142	4.74764e-06

## Sheet: pleiotropy
id.exposure	id.outcome	outcome	exposure	egger_intercept	se	pval
ieu-b-33	finn-b-C3_COLORECTAL	Colorectal cancer || id:finn-b-C3_COLORECTAL	|| id:ieu-b-33	0.000234251	0.00450063	0.958541
ieu-b-33	finn-b-C3_SKIN	Malignant neoplasm of skin || id:finn-b-C3_SKIN	|| id:ieu-b-33	-0.0046456	0.00293476	0.114995
ieu-b-33	finn-b-C3_OTHER_SKIN	Other malignant neoplasms of skin (=non-melanoma skin cancer) || id:finn-b-C3_OTHER_SKIN	|| id:ieu-b-33	-0.00469136	0.002929	0.110786
ieu-b-33	ieu-b-4965	Colorectal cancer || id:ieu-b-4965	|| id:ieu-b-33	4.23188e-06	4.53157e-05	0.925685
ieu-b-33	ieu-b-4969	Melanoma skin cancer || id:ieu-b-4969	|| id:ieu-b-33	-3.87744e-05	3.73681e-05	0.30064
ieu-b-33	ieu-b-4959	Malignant non-melanoma skin cancer || id:ieu-b-4959	|| id:ieu-b-33	-9.5056e-05	0.000118974	0.425254
ukb-d-30210_irnt	finn-b-C3_COLORECTAL	Colorectal cancer || id:finn-b-C3_COLORECTAL	|| id:ukb-d-30210_irnt	0.00169118	0.00541315	0.755167
ukb-d-30210_irnt	finn-b-C3_SKIN	Malignant neoplasm of skin || id:finn-b-C3_SKIN	|| id:ukb-d-30210_irnt	-0.00617494	0.00335866	0.0680188
ukb-d-30210_irnt	finn-b-C3_OTHER_SKIN	Other malignant neoplasms of skin (=non-melanoma skin cancer) || id:finn-b-C3_OTHER_SKIN	|| id:ukb-d-30210_irnt	-0.0050324	0.00326216	0.125094
ukb-d-30210_irnt	ieu-b-4965	Colorectal cancer || id:ieu-b-4965	|| id:ukb-d-30210_irnt	8.71146e-05	5.70731e-05	0.129096
ukb-d-30210_irnt	ieu-b-4969	Melanoma skin cancer || id:ieu-b-4969	|| id:ukb-d-30210_irnt	-7.09721e-05	4.74816e-05	0.137159
ukb-d-30210_irnt	ieu-b-4959	Malignant non-melanoma skin cancer || id:ieu-b-4959	|| id:ukb-d-30210_irnt	2.90314e-05	0.000137899	0.833561
