# Supplementary material for: Eosinophils and drugs for eosinophilia are associated with the risk of colorectal cancer: a Mendelian randomization study
Source: Aging (Albany NY). 2024 Aug 23;16(16):12050–62. doi: 10.18632/aging.206081 (PMC11386931; doi:10.18632/aging.206081)
Supplement: Supplementary Table 2 [file aging-16-206081-s002.xlsx]

## Sheet: heterogeneity
Supplementary Table 2. The pleiotropy and heterogeneity results of asthma and risk of colorectal cancer and skin malignancies.
id.exposure	id.outcome	outcome	exposure	method	Q	Q_df	Q_pval
ebi-a-GCST90014325	ieu-b-4965	Colorectal cancer || id:ieu-b-4965	Asthma || id:ebi-a-GCST90014325	MR Egger	76.309	52	0.0156849
ebi-a-GCST90014325	ieu-b-4965	Colorectal cancer || id:ieu-b-4965	Asthma || id:ebi-a-GCST90014325	Inverse variance weighted	76.3863	53	0.0194022
ebi-a-GCST90014325	ieu-b-4969	Melanoma skin cancer || id:ieu-b-4969	Asthma || id:ebi-a-GCST90014325	MR Egger	55.7103	51	0.30211
ebi-a-GCST90014325	ieu-b-4969	Melanoma skin cancer || id:ieu-b-4969	Asthma || id:ebi-a-GCST90014325	Inverse variance weighted	56.0724	52	0.324781
ebi-a-GCST90014325	ieu-b-4959	Malignant non-melanoma skin cancer || id:ieu-b-4959	Asthma || id:ebi-a-GCST90014325	MR Egger	114.515	48	2.32505e-07
ebi-a-GCST90014325	ieu-b-4959	Malignant non-melanoma skin cancer || id:ieu-b-4959	Asthma || id:ebi-a-GCST90014325	Inverse variance weighted	120.09	49	6.68819e-08

## Sheet: pleiotropy
id.exposure	id.outcome	outcome	exposure	egger_intercept	se	pval
ebi-a-GCST90014325	ieu-b-4965	Colorectal cancer || id:ieu-b-4965	Asthma || id:ebi-a-GCST90014325	3.22434e-05	0.000140496	0.819383
ebi-a-GCST90014325	ieu-b-4969	Melanoma skin cancer || id:ieu-b-4969	Asthma || id:ebi-a-GCST90014325	-5.74106e-05	9.97267e-05	0.567364
ebi-a-GCST90014325	ieu-b-4959	Malignant non-melanoma skin cancer || id:ieu-b-4959	Asthma || id:ebi-a-GCST90014325	-0.000571607	0.000373911	0.132896
