# Supplementary material for: Eosinophils and drugs for eosinophilia are associated with the risk of colorectal cancer: a Mendelian randomization study
Source: Aging (Albany NY). 2024 Aug 23;16(16):12050–62. doi: 10.18632/aging.206081 (PMC11386931; doi:10.18632/aging.206081)
Supplement: Supplementary Table 3 [file aging-16-206081-s003.xlsx]

## Sheet: heterogeneity
Supplementary Table 3. The pleiotropy and heterogeneity results of asthma, eosinophil count, and risk of colorectal cancer and skin malignancies.
id.outcome	outcome	method	statistic	p-value
ieu-b-4965	Colorectal cancer || id:ieu-b-4965	MR Egger	516.073	0.000100293
ieu-b-4965	Colorectal cancer || id:ieu-b-4965	Inverse variance weighted	516.098	0.000114262
ieu-b-4969	Melanoma skin cancer || id:ieu-b-4969	MR Egger	480.905	0.0041182
ieu-b-4969	Melanoma skin cancer || id:ieu-b-4969	Inverse variance weighted	481.045	0.00449558
ieu-b-4959	Malignant non-melanoma skin cancer || id:ieu-b-4959	MR Egger	1232.93	3.36539e-85
ieu-b-4959	Malignant non-melanoma skin cancer || id:ieu-b-4959	Inverse variance weighted	1237.14	1.42311e-85

## Sheet: pleiotropy
id.outcome	outcome	egger_intercept	se	p-value
ieu-b-4965	Colorectal cancer || id:ieu-b-4965	-3.70675e-06	2.68411e-05	0.890162
ieu-b-4969	Melanoma skin cancer || id:ieu-b-4969	7.27931e-06	2.12661e-05	0.732128
ieu-b-4959	Malignant non-melanoma skin cancer || id:ieu-b-4959	-9.25828e-05	7.90297e-05	0.241401
