# Supplementary material for: Eosinophils and drugs for eosinophilia are associated with the risk of colorectal cancer: a Mendelian randomization study
Source: Aging (Albany NY). 2024 Aug 23;16(16):12050–62. doi: 10.18632/aging.206081 (PMC11386931; doi:10.18632/aging.206081)
Supplement: Supplementary Table 4 [file aging-16-206081-s004.xlsx]

## Sheet: heterogeneity
Supplementary Table 4. The pleiotropy and heterogeneity results of eosinophils mediated by gene IL-4, IL-5, IL-13, IL-4R, and IL-5RA and risk of colorectal cancer and skin malignancies.
Drug Target	id.outcome	outcome	method	Q	Q_df	Q_pval
IL4	ieu-b-4965	Colorectal cancer || id:ieu-b-4965	MR Egger	3.74377	3	0.290495
IL4	ieu-b-4965	Colorectal cancer || id:ieu-b-4965	Inverse variance weighted	3.93335	4	0.415101
IL4	ieu-b-4969	Melanoma skin cancer || id:ieu-b-4969	MR Egger	2.46282	3	0.482048
IL4	ieu-b-4969	Melanoma skin cancer || id:ieu-b-4969	Inverse variance weighted	6.29426	4	0.178224
IL4	ieu-b-4959	Malignant non-melanoma skin cancer || id:ieu-b-4959	MR Egger	1.58769	3	0.662185
IL4	ieu-b-4959	Malignant non-melanoma skin cancer || id:ieu-b-4959	Inverse variance weighted	7.06571	4	0.132456
IL5	ieu-b-4965	Colorectal cancer || id:ieu-b-4965	MR Egger	0.769695	2	0.680554
IL5	ieu-b-4965	Colorectal cancer || id:ieu-b-4965	Inverse variance weighted	4.92251	3	0.17756
IL5	ieu-b-4969	Melanoma skin cancer || id:ieu-b-4969	MR Egger	2.70695	2	0.258341
IL5	ieu-b-4969	Melanoma skin cancer || id:ieu-b-4969	Inverse variance weighted	5.90676	3	0.116236
IL5	ieu-b-4959	Malignant non-melanoma skin cancer || id:ieu-b-4959	MR Egger	5.18624	2	0.0747865
IL5	ieu-b-4959	Malignant non-melanoma skin cancer || id:ieu-b-4959	Inverse variance weighted	10.7984	3	0.0128673
IL13	ieu-b-4965	Colorectal cancer || id:ieu-b-4965	MR Egger	3.78626	4	0.435704
IL13	ieu-b-4965	Colorectal cancer || id:ieu-b-4965	Inverse variance weighted	3.9453	5	0.557318
IL13	ieu-b-4969	Melanoma skin cancer || id:ieu-b-4969	MR Egger	2.77684	4	0.595837
IL13	ieu-b-4969	Melanoma skin cancer || id:ieu-b-4969	Inverse variance weighted	7.25441	5	0.202397
IL13	ieu-b-4959	Malignant non-melanoma skin cancer || id:ieu-b-4959	MR Egger	1.65901	4	0.798149
IL13	ieu-b-4959	Malignant non-melanoma skin cancer || id:ieu-b-4959	Inverse variance weighted	9.9891	5	0.0755448
IL4R	ieu-b-4965	Colorectal cancer || id:ieu-b-4965	MR Egger	2.81403	3	0.421196
IL4R	ieu-b-4965	Colorectal cancer || id:ieu-b-4965	Inverse variance weighted	8.01035	4	0.0911998
IL4R	ieu-b-4969	Melanoma skin cancer || id:ieu-b-4969	MR Egger	0.415328	3	0.937058
IL4R	ieu-b-4969	Melanoma skin cancer || id:ieu-b-4969	Inverse variance weighted	0.419335	4	0.980864
IL4R	ieu-b-4959	Malignant non-melanoma skin cancer || id:ieu-b-4959	MR Egger	12.2421	3	0.00659836
IL4R	ieu-b-4959	Malignant non-melanoma skin cancer || id:ieu-b-4959	Inverse variance weighted	12.3101	4	0.0151881
IL5RA	ieu-b-4965	Colorectal cancer || id:ieu-b-4965	MR Egger	3.47984	4	0.480951
IL5RA	ieu-b-4965	Colorectal cancer || id:ieu-b-4965	Inverse variance weighted	3.64831	5	0.601074
IL5RA	ieu-b-4969	Melanoma skin cancer || id:ieu-b-4969	MR Egger	10.2376	4	0.0366097
IL5RA	ieu-b-4969	Melanoma skin cancer || id:ieu-b-4969	Inverse variance weighted	12.5501	5	0.0279805
IL5RA	ieu-b-4959	Malignant non-melanoma skin cancer || id:ieu-b-4959	MR Egger	4.76512	4	0.312257
IL5RA	ieu-b-4959	Malignant non-melanoma skin cancer || id:ieu-b-4959	Inverse variance weighted	5.29147	5	0.381354

## Sheet: pleiotropy
Drug Target	id.outcome	outcome	egger_intercept	se	pval
IL4	ieu-b-4965	Colorectal cancer || id:ieu-b-4965	0.000381695	0.000979285	0.722731
IL4	ieu-b-4969	Melanoma skin cancer || id:ieu-b-4969	-0.0014082	0.000719421	0.145219
IL4	ieu-b-4959	Malignant non-melanoma skin cancer || id:ieu-b-4959	-0.00390762	0.00166956	0.101174
IL5	ieu-b-4965	Colorectal cancer || id:ieu-b-4965	0.00302494	0.00148438	0.178449
IL5	ieu-b-4969	Melanoma skin cancer || id:ieu-b-4969	-0.00217968	0.00141761	0.263984
IL5	ieu-b-4959	Malignant non-melanoma skin cancer || id:ieu-b-4959	-0.00670277	0.00455616	0.279081
IL13	ieu-b-4965	Colorectal cancer || id:ieu-b-4965	0.000262118	0.000657282	0.71042
IL13	ieu-b-4969	Melanoma skin cancer || id:ieu-b-4969	-0.00114146	0.000539436	0.101797
IL13	ieu-b-4959	Malignant non-melanoma skin cancer || id:ieu-b-4959	-0.00361255	0.00125167	0.0447339
IL4R	ieu-b-4965	Colorectal cancer || id:ieu-b-4965	0.00153034	0.000671334	0.10698
IL4R	ieu-b-4969	Melanoma skin cancer || id:ieu-b-4969	3.48865e-05	0.000551109	0.953507
IL4R	ieu-b-4959	Malignant non-melanoma skin cancer || id:ieu-b-4959	0.00033366	0.00258347	0.90541
IL5RA	ieu-b-4965	Colorectal cancer || id:ieu-b-4965	0.000127891	0.000311579	0.702502
IL5RA	ieu-b-4969	Melanoma skin cancer || id:ieu-b-4969	0.000388869	0.000409106	0.395668
IL5RA	ieu-b-4959	Malignant non-melanoma skin cancer || id:ieu-b-4959	-0.000430643	0.000647872	0.542601
