# Supplementary material for: Eosinophils and drugs for eosinophilia are associated with the risk of colorectal cancer: a Mendelian randomization study
Source: Aging (Albany NY). 2024 Aug 23;16(16):12050–62. doi: 10.18632/aging.206081 (PMC11386931; doi:10.18632/aging.206081)
Supplement: Supplementary Table 5 [file aging-16-206081-s005.xlsx]

## Sheet: Sheet1
Supplementary Table 5. The pleiotropy and heterogeneity results of eosinophils mediated by gene IL-4, IL-5, IL-13, IL-4R, and IL-5RA and risk of colorectal cancer.
Drug Target	id.outcome	outcome	method	Q	Q_df	Q_pval
IL4	finn-b-C3_COLORECTAL	Colorectal cancer || id:finn-b-C3_COLORECTAL	MR Egger	0.41189	3	0.937775
IL4	finn-b-C3_COLORECTAL	Colorectal cancer || id:finn-b-C3_COLORECTAL	Inverse variance weighted	0.45882	4	0.977384
IL5	finn-b-C3_COLORECTAL	Colorectal cancer || id:finn-b-C3_COLORECTAL	MR Egger	0.116228	1	0.733162
IL5	finn-b-C3_COLORECTAL	Colorectal cancer || id:finn-b-C3_COLORECTAL	Inverse variance weighted	0.337244	2	0.844828
IL13	finn-b-C3_COLORECTAL	Colorectal cancer || id:finn-b-C3_COLORECTAL	MR Egger	0.41189	3	0.937775
IL13	finn-b-C3_COLORECTAL	Colorectal cancer || id:finn-b-C3_COLORECTAL	Inverse variance weighted	0.45882	4	0.977384
IL4R	finn-b-C3_COLORECTAL	Colorectal cancer || id:finn-b-C3_COLORECTAL	MR Egger	0.742207	1	0.388955
IL4R	finn-b-C3_COLORECTAL	Colorectal cancer || id:finn-b-C3_COLORECTAL	Inverse variance weighted	1.29495	2	0.523365
IL5RA	finn-b-C3_COLORECTAL	Colorectal cancer || id:finn-b-C3_COLORECTAL	MR Egger	0.994813	4	0.910582
IL5RA	finn-b-C3_COLORECTAL	Colorectal cancer || id:finn-b-C3_COLORECTAL	Inverse variance weighted	1.78557	5	0.877949

## Sheet: Sheet2
Drug Target	id.outcome	outcome	egger_intercept	se	pval
IL4	finn-b-C3_COLORECTAL	Colorectal cancer || id:finn-b-C3_COLORECTAL	0.0218572	0.100895	0.842389
IL5	finn-b-C3_COLORECTAL	Colorectal cancer || id:finn-b-C3_COLORECTAL	-0.0772849	0.164393	0.72023
IL13	finn-b-C3_COLORECTAL	Colorectal cancer || id:finn-b-C3_COLORECTAL	0.0218572	0.100895	0.842389
IL4R	finn-b-C3_COLORECTAL	Colorectal cancer || id:finn-b-C3_COLORECTAL	0.131466	0.176827	0.593004
IL5RA	finn-b-C3_COLORECTAL	Colorectal cancer || id:finn-b-C3_COLORECTAL	0.0264924	0.0297921	0.424119
