# Supplementary material for: Eosinophils and drugs for eosinophilia are associated with the risk of colorectal cancer: a Mendelian randomization study
Source: Aging (Albany NY). 2024 Aug 23;16(16):12050–62. doi: 10.18632/aging.206081 (PMC11386931; doi:10.18632/aging.206081)
Supplement: Supplementary Table 6 [file aging-16-206081-s006.xlsx]

## Sheet: Sheet1
Supplementary Table 6. Detailed information on each tumor.
ID	trait	Population	Sample size	Number of SNPs	Year	Author
ieu-b-33	eosinophil cell count	European	563946	26775882	2020	Vuckovic, D
ukb-d-30210_irnt	Eosinophill percentage	European	349861	13586283	2018	Neale lab
ebi-a-GCST90014325	Asthma	European	408422	34551291	2021	Valette K
ieu-b-4959	Malignant non-melanoma skin cancer	European	395710	12321875	2021	Burrows
ieu-b-4810	Breast cancer	European	212402	12320811	2021	Burrows
ieu-b-4969	Melanoma skin cancer	European	375767	11396019	2021	Burrows
ieu-b-4965	Colorectal cancer	European	377673	11738639	2021	Burrows
ieu-b-4954	Lung cancer	European	374687	11078115	2021	Burrows
ieu-b-4955	Lung cancer	European	374687	11078115	2021	Burrows
ieu-b-4953	Liver cell carcinoma	European	372184	6304034	2021	Burrows
ieu-b-4963	Ovarian cancer	European	199741	9822229	2021	Burrows
ieu-b-4915	Liver & bile duct cancer	European	372366	7687713	2021	Burrows
ieu-b-4958	Myeloid leukaemia	European	372478	8171258	2021	Burrows
ieu-b-4875	brain cancer	European	372622	8629116	2021	Burrows
ieu-b-4968	Oropharyngeal cancer	European	372510	8283869	2021	Burrows
ieu-b-4962	Oral and oropharyngeal cancer	European	372855	9185233	2021	Burrows
ieu-b-4912	Head and neck cancer	European	373122	9655080	2021	Burrows
ieu-b-4876	cervical cancer	European	199086	8506261	2021	Burrows
ieu-b-4913	Laryngeal cancer	European	372289	7239512	2021	Burrows
ieu-b-4878	haemotological cancer	European	376568	11562585	2021	Burrows
ieu-b-4961	Oral cavity cancer	European	372373	7723107	2021	Burrows
ieu-b-4914	Leukaemia	European	373276	9880879	2021	Burrows
ieu-b-4960	Oesophageal cancer	European	372756	8970465	2021	Burrows
ieu-b-4956	Lymphoid leukaemia	European	372776	9015063	2021	Burrows
ieu-b-4874	Bladder cancer	European	373295	9904926	2021	Burrows
ieu-b-4809	Prostate cancer	European	182625	12096464	2021	Burrows
finn-b-C3_SECONDARY_NAS	Secondary malignant neoplasm of other and unspecified sites	European	218792	16380466	2021	NA
finn-b-C3_COLON_ADENO	Colon adenocarcinoma	European	218792	16380466	2021	NA
finn-b-C3_COLON	Malignant neoplasm of colon	European	218792	16380466	2021	NA
finn-b-C3_CERVIX_UTERI	Malignant neoplasm of cervix uteri	European	123579	16379784	2021	NA
finn-b-C3_COLORECTAL	Colorectal cancer	European	218792	16380466	2021	NA
finn-b-C3_OTHER_SKIN	Other malignant neoplasms of skin (=non-melanoma skin cancer)	European	218792	16380466	2021	NA
finn-b-C3_SKIN	Malignant neoplasm of skin	European	218792	16380466	2021	NA
finn-b-C3_FEMALE_GENITAL	malignant neoplasm of female genital organs	European	123579	16379784	2021	NA
finn-b-C3_MELANOMA_SKIN	Malignant melanoma of skin	European	218792	16380466	2021	NA
finn-b-C3_EYE_ADNEXA	Malignant neoplasm of eye and adnexa	European	218792	16380466	2021	NA
finn-b-C3_RECTOSIGMOID_JUNCTION	Malignant neoplasm of rectosigmoid junction	European	218792	16380466	2021	NA
finn-b-C3_FEMALE_GENITAL_NAS	Malignant neoplasm of other and unspecified female genital organs	European	123579	16379784	2021	NA
finn-b-C3_BRAIN	Malignant neoplasm of brain	European	218792	16380466	2021	NA
finn-b-C3_BILIARY_TRACT	Malignant neoplasm of other and unspecified parts of biliary tract	European	218792	16380466	2021	NA
finn-b-C3_LIVER_INTRAHEPATIC_BILE_DUCTS	Malignant neoplasm of liver and intrahepatic bile ducts	European	218792	16380466	2021	NA
finn-b-C3_OESOPHAGUS	Malignant neoplasm of oesophagus	European	218792	16380466	2021	NA
finn-b-C3_MENINGES	Malignant neoplasm of meninges	European	218792	16380466	2021	NA
finn-b-C3_EYE_BRAIN_NEURO	Malignant neoplasm of eye, brain and central nervous system	European	218792	16380466	2021	NA
finn-b-C3_STOMACH	Malignant neoplasm of stomach	European	218792	16380466	2021	NA
finn-b-C3_DIGESTIVE_ORGANS	Malignant neoplasm of digestive organs	European	218792	16380466	2021	NA
finn-b-C3_OVARY	Malignant neoplasm of ovary	European	123579	16379784	2021	NA
finn-b-C3_CORPUS_UTERI	Malignant neoplasm of corpus uteri	European	123579	16379784	2021	NA
finn-b-C3_SECONDARY_WITHOUT_SITESPEC	Malignant neoplasm, without specification of site	European	218792	16380466	2021	NA
finn-b-C3_RECTUM	Malignant neoplasm of rectum	European	218792	16380466	2021	NA
finn-b-C3_AML	Acute myeloid leukaemia	European	218792	16380466	2021	NA
finn-b-C3_LUNG_NONSMALL	Non-small cell lung cancer	European	218792	16380466	2021	NA
finn-b-C3_SMALL_INTESTINE	Malignant neoplasm of small intestine	European	218792	16380466	2021	NA
finn-b-C3_BREAST	Malignant neoplasm of breast	European	123579	16379784	2021	NA
finn-b-C3_MESTOTHEL_SOFTTISSUE	Melignant neoplasm of mesothelium and soft tissue	European	218792	16380466	2021	NA
finn-b-C3_BREAST_HERNEG	Malignant neoplasm of breast, HER-negative	European	119039	16379675	2021	NA
finn-b-C3_BREAST_HER2NEG	Malignant neoplasm of breast, HER2-negative	European	123579	16379784	2021	NA
finn-b-C3_UNCERTAIN_SECONDARY	Secondary uncertain malignant neoplasm	European	218792	16380466	2021	NA
finn-b-C3_HEART_MEDIASTINUM_PLEURA	Malignant neoplasm of heart, mediastinum and pleura	European	218792	16380466	2021	NA
finn-b-C3_BREAST_HERPLUS	Malignant neoplasm of breast, HER-positive	European	123302	16379780	2021	NA
finn-b-C3_GBM	Brain glioblastoma	European	218792	16380466	2021	NA
finn-b-C3_BLADDER	Malignant neoplasm of bladder	European	218792	16380466	2021	NA
finn-b-C3_SCLC	Small cell lung cancer	European	218792	16380466	2021	NA
finn-b-C3_PANCREAS	Malignant neoplasm of pancreas	European	218792	16380466	2021	NA
finn-b-C3_DLBCL	Diffuse large B-cell lymphoma	European	218792	16380466	2021	NA
finn-b-C3_CONNECTIVE_SOFT_NAS	Malignant neoplasm of other connective and soft tissue	European	218792	16380466	2021	NA
finn-b-C3_NSCLC_SQUAM	Non-small cell lung cancer, squamous	European	218792	16380466	2021	NA
finn-b-C3_URINARY_TRACT	Malignant neoplasm of urinary organs	European	218792	16380466	2021	NA
finn-b-C3_BRONCHUS_LUNG	Malignant neoplasm of bronchus and lung	European	218792	16380466	2021	NA
finn-b-C3_MALE_GENITAL	malignant neoplasm of male genital organs	European	95213	16378835	2021	NA
finn-b-C3_PROSTATE	Malignant neoplasm of prostate	European	95213	16378835	2021	NA
finn-b-C3_RESPIRATORY_INTRATHORACIC	Malignant neoplasm of respiratory system and intrathoracic organs	European	218792	16380466	2021	NA
finn-b-C3_THYROID_GLAND	Malignant neoplasm of thyroid gland	European	218792	16380466	2021	NA
finn-b-C3_ENDOCRINE	Malignant neoplasm of endocrine gland	European	218792	16380466	2021	NA
finn-b-C3_TESTIS	Malignant neoplasm of testis	European	95213	16378835	2021	NA
finn-b-C3_LYMPHNODES_SECONDARY_NAS	Secondary and unspecified malignant neoplasm of lymph nodes	European	218792	16380466	2021	NA
finn-b-C3_CLL	Chronic lymphocytic leukaemia	European	218792	16380466	2021	NA
finn-b-C3_KIDNEY_NOTRENALPELVIS	Malignant neoplasm of kidney, except renal pelvis	European	218792	16380466	2021	NA
finn-b-C3_LARYNX	Malignant neoplasm of larynx	European	218792	16380466	2021	NA
finn-b-C3_NSCLC_ADENO	Non-small cell lung cancer, adenocarcinoma	European	218792	16380466	2021	NA
finn-b-C3_VULVA	Malignant neoplasm of vulva	European	123579	16379784	2021	NA
finn-b-C3_MESOTHELIOMA	Mesothelioma	European	218792	16380466	2021	NA
finn-b-C3_LIP_ORAL_PHARYNX	Malignant neoplasm of lip, oral cavity and pharynx	European	218792	16380466	2021	NA
finn-b-C3_BONE_CARTILAGE	Malignant neoplasm of bone and articular cartilage	European	218792	16380466	2021	NA
finn-b-C3_SPINAL_CORD_CRANIAL_AND_OTHER_CNS	Malignant neoplasm of spinal cord, cranial nerves and other parts of central nervous system	European	218792	16380466	2021	NA
finn-b-C3_ANUS_ANALCANAL	Malignant neoplasm of anus and anal canal	European	218792	16380466	2021	NA
